# Supplementary material for: Adsorption removal of Congo red over flower-like porous microspheres derived from Ni/Al layered double hydroxide
Source: Royal Society of Chemistry journal article supplement (doi:10.1039/c5ra13922h), 2015-01-01
Supplement: c5ra13922h1.pdf [file c5ra13922h1.pdf]

Supplementary Data:

Adsorption removal of Congo red over flower-like porous microspheres derived from Ni/Al layered double hydroxide

Weiya Huang <sup>a,b</sup>, Xiang Yu <sup>d</sup>, Dan Li <sup>c,\*</sup>

<sup>a</sup> School of Metallurgy and Chemical Engineering, Jiangxi University of Science and Technology, Ganzhou 341000, China;

<sup>b</sup> Department of Materials Science and Engineering, Taizhou University, Linhai, 317000, China;

<sup>c</sup> School of Engineering and Information Technology, Murdoch University, Murdoch, Western Australia, 6150, Australia; Tel: +61 08 9360 2569, Email: [l.li@murdoch.edu.au](mailto:l.li@murdoch.edu.au);

<sup>d</sup> Department of Chemistry, Jinan University, Guangzhou, 510632, China.

**Table S1.** Molecular formula, chemical structure and maximum adsorption wavelength of Congo red used in this study.

| Generic name | Molecular formula           | CAS      | Molecular weight | Purity | Structure                                                                           | $\lambda_{\max}$ (nm) |
|--------------|-----------------------------|----------|------------------|--------|-------------------------------------------------------------------------------------|-----------------------|
| Congo red    | $C_{32}H_{22}N_6Na_2O_6S_2$ | 573-58-0 | 696.66 g/mol     | 95%    | 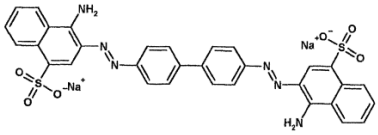 | 498                   |

**Table S2.** Pseudo-first-order, pseudo-second-order, intra-particle diffusion and Elovich model constants and correlation coefficients using Ni/Al-CLDH-H.

| Model                    | Parameter                                         |         |
|--------------------------|---------------------------------------------------|---------|
| Pseudo-first-order       | $k_1$ ( $\text{min}^{-1}$ )                       | 0.0283  |
|                          | $q_e$ (cal) ( $\text{mg g}^{-1}$ )                | 78.3    |
|                          | $r^2$                                             | 0.9425  |
| Pseudo-second-order      | $k_2$ ( $\text{g mg}^{-1} \text{min}^{-1}$ )      | 0.00171 |
|                          | $q_e$ (cal) ( $\text{mg g}^{-1}$ )                | 245.0   |
|                          | $r^2$                                             | 0.9999  |
| Intra-particle diffusion | $k_{d1}$ ( $\text{mg g}^{-1} \text{min}^{-0.5}$ ) | 95.34   |
|                          | $C_1$                                             | 0       |
|                          | $r_1^2$                                           | 1       |
|                          | $k_{d2}$ ( $\text{mg g}^{-1} \text{min}^{-0.5}$ ) | 23.65   |
|                          | $C_2$                                             | 105.6   |
|                          | $r_2^2$                                           | 0.9170  |
|                          | $k_{d3}$ ( $\text{mg g}^{-1} \text{min}^{-0.5}$ ) | 0.71    |
|                          | $C_3$                                             | 231.4   |
|                          | $r_3^2$                                           | 0.5996  |
| Elovich                  | $\alpha$ ( $\text{mg g}^{-1} \text{min}^{-1}$ )   | 27.16   |
|                          | $\beta$ ( $\text{g mg}^{-1}$ )                    | 21.28   |
|                          | $r^2$                                             | 0.8514  |

**Table S3.** Effect of ion strength, dosage, and initial pH on CR adsorption using Ni/Al-CLDH-

H.

|                                         | Ion strength<br>(NaCl mol L <sup>-1</sup> ) |        |        |       | Dosage of adsorbent<br>(g L <sup>-1</sup> ) |        |       | Initial pH |        |        |
|-----------------------------------------|---------------------------------------------|--------|--------|-------|---------------------------------------------|--------|-------|------------|--------|--------|
|                                         | 0                                           | 0.001  | 0.005  | 0.1   | 0.25                                        | 0.4    | 1.0   | 6          | 8      | 10     |
| q <sub>e</sub><br>(mg g <sup>-1</sup> ) | 232.63                                      | 235.65 | 238.28 | 239.0 | 372.2                                       | 234.67 | 97.20 | 238.86     | 239.52 | 238.17 |

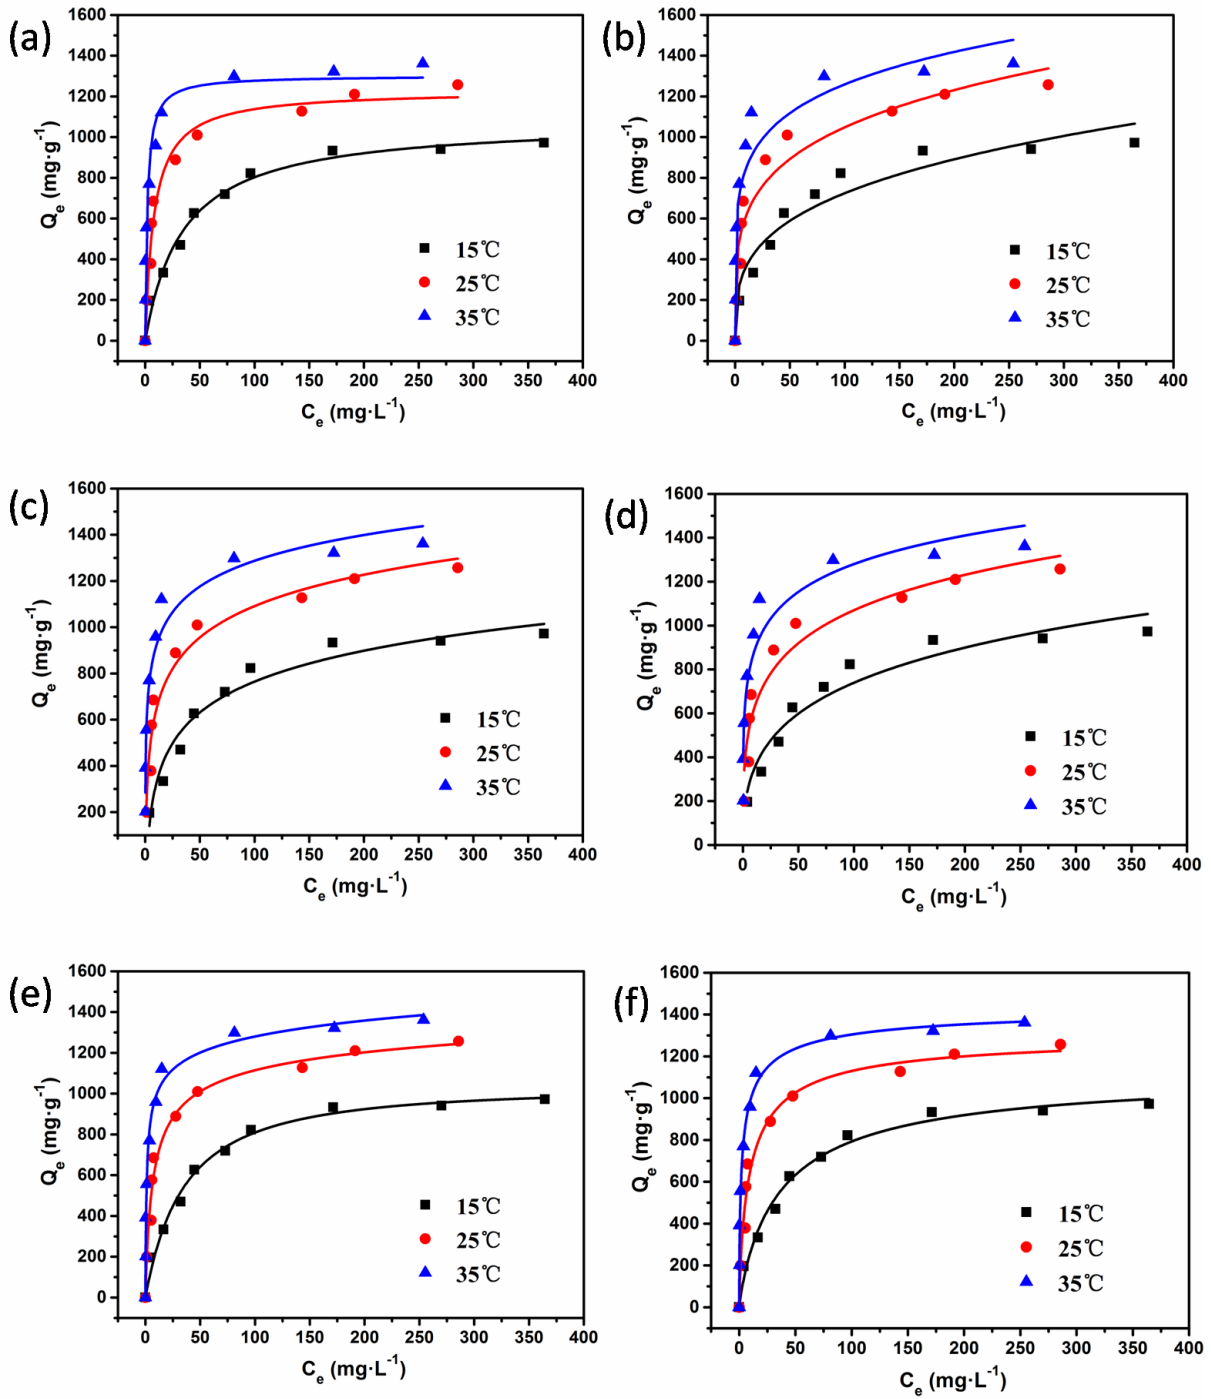

**Fig. S1.** (a) Langmuir, (b) Freundlich, (c) Dubinin-Radushkevich, (d) Temkin, (e) Redlich–Peterson, (f) Sips adsorption isotherms of Ni/Al-CLDH-H at 15 °C, 25 °C, and 35 °C.

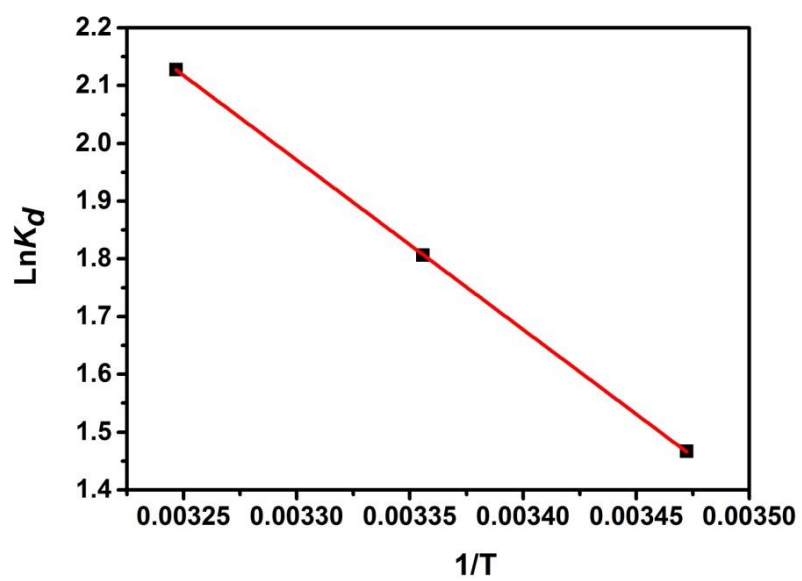

**Fig. S2.** Plot of  $\text{Ln}K_d$  vs.  $1/T$  for the adsorption of CR onto Ni/Al-CLDH-H.
